# Supplementary material for: Platelet-rich plasma-derived exosomes accelerate the healing of diabetic foot ulcers by promoting macrophage polarization to the M2 phenotype
Source: Research Square preprint supplement (doi:10.21203/rs.3.rs-5945926/v1), 2025-03-27
Supplement: Supplementary file 1 [file 318deebc31ca202cd86e3564.docx]

**Supplementary Materials for**

**Platelet-rich plasma-derived exosomes accelerate the healing of diabetic foot ulcers by promoting macrophage polarization toward the M2 phenotype**

Ling Hea,b,c, Nan Zhaod , Xiaoling Chena, Wenjie Zhanga, Kun Lvbe*, Yuanhong Xua*

Correspondence to:[xyhong1964@163.com(Y.Xu);](mailto:xyhong1964@163.com(Y.Xu);) [lvkun315@163.com(K. Lv)](mailto:lvkun315@163.com;)

**This file includes:**

**Tables S1 to S2**

**Supplemental Table S1 General Information of Diabetic Patients Undergoing PRP-gel Treatment**

| Gender ratio (male: female) | 25:11 |
| --- | --- |
| Age | 58.03±1.806 |
| Height (m) | 1.663±0.01 |
| Weight (kg) | 61.08±1.89 |
| BMI | 22.04±0.60 |
| Duration of Diabetes (years) | 11.72±1.24 |
| Duration of Diabetic Foot (months) | 27.69±4.37 |
| Hypertension Rate | 40.74% |
| Coronary Heart Disease Rate | 5.56% |
| Peripheral Neuropathy Rate | 58.33% |
| Wagner Classification | 2（14）3（14）4（8） |
| **Ulcer Location** |  |
| Toes | 21 |
| Interdigital Spaces | 4 |
| Plantar Surface | 6 |
| Dorsal Surface | 2 |
| Ankle and Above | 3 |
| **Affected Limb** |  |
| Left Foot | 13 |
| Right Foot | 17 |
| Both Feet | 6 |

**Supplemental Table S2. Comparison of General Data of Diabetic Patients Before and After PRP-gel Treatment**

|  | **Before PRP-gel Treatment** | **After PRP-gel Treatment** | *p*-value |
| --- | --- | --- | --- |
| Fasting Blood Glucose | 10.94 ± 0.66 | 11.19 ± 0.67 | 0.79 |
| 2-Hour Postprandial BG | 12.83 ± 0.62 | 13.25 ± 1.04 | 0.73 |
| HbA1a | 0.96 ± 0.03 | 0.99 ± 0.04 | 0.53 |
| HbA1b | 0.73 ± 0.04 | 0.79 ± 0.04 | 0.27 |
| HbA1c | 9.63 ± 0.43 | 10.21 ± 0.40 | 0.33 |
